# Supplementary material for: Short-acting bronchodilators for the management of acute exacerbations of chronic obstructive pulmonary disease in the hospital setting: systematic review
Source: Springer Nature journal article supplement (doi:10.1186/s13643-018-0860-0), 2018-11-29
Supplement: MOESM2 [file 16304896]

## Search Strategy

Search strategy to identify included studies in MEDLINE:

- 1 Pulmonary Disease, Chronic Obstructive/
- 2 chronic obstructive pulmonary disease.mp. [mp=title, original title, abstract, mesh headings, heading words, keyword]
- 3 copd.mp. [mp=title, original title, abstract, mesh headings, heading words, keyword]
- 4 chronic obstructive lung disease.mp.
- 5 coad.mp. [mp=title, original title, abstract, mesh headings, heading words, keyword]
- 6 chronic obstructive airway disease.mp.
- 7 1 or 2 or 3 or 4 or 5 or 6
- 8 inpatients/
- 9 inpatient\*.mp. [mp=title, original title, abstract, mesh headings, heading words, keyword]
- 10 exp hospitalization/
- 11 hospitalis\*.mp. [mp=title, original title, abstract, mesh headings, heading words, keyword]
- 12 hospitaliz\*.mp. [mp=title, original title, abstract, mesh headings, heading words, keyword]
- 13 (admission adj5 hospital).mp. [mp=title, original title, abstract, mesh headings, heading words, keyword]
- 14 8 or 9 or 10 or 11 or 12 or 13
- 15 exp Bronchodilator Agents/
- 16 bronchodilator\*.mp. [mp=title, original title, abstract, mesh headings, heading words, keyword]
- 17 exp adrenergic beta-agonists/ or exp adrenergic beta-2 receptor agonists/
- 18 beta 2 agonist\*.mp.
- 19 beta agonist\*.mp.
- 20 adrenergic beta agonist\*.mp. [mp=title, original title, abstract, mesh headings, heading words, keyword]
- 21 15 or 16 or 17 or 18 or 19 or 20
- 22 short acting.mp. [mp=title, original title, abstract, mesh headings, heading words, keyword]
- 23 21 and 22
- 24 saba.mp. [mp=title, original title, abstract, mesh headings, heading words, keyword]
- 25 albuterol.mp. [mp=title, original title, abstract, mesh headings, heading words, keyword]
- 26 exp Albuterol/
- 27 salbutamol.mp.
- 28 exp Terbutaline/
- 29 terbutaline.mp. [mp=title, original title, abstract, mesh headings, heading words, keyword]
- 30 Ipratropium/
- 31 ipratropium.mp. [mp=title, original title, abstract, mesh headings, heading words, keyword]
- 32 Isoproterenol/
- 33 isoproterenol.mp. [mp=title, original title, abstract, mesh headings, heading words, keyword]
- 34 bitolterol.mp.
- 35 Fenoterol/
- 36 fenoterol.mp. [mp=title, original title, abstract, mesh headings, heading words, keyword]
- 37 Isoetharine/
- 38 isoetharine.mp. [mp=title, original title, abstract, mesh headings, heading words, keyword]
- 39 levalbuterol.mp.
- 40 Metaproterenol/
- 41 metaproterenol.mp. [mp=title, original title, abstract, mesh headings, heading words, keyword]
- 42 pirbuterol.mp. [mp=title, original title, abstract, mesh headings, heading words, keyword]
- 43 Procaterol/
- 44 procaterol.mp. [mp=title, original title, abstract, mesh headings, heading words, keyword]
- 45 procaterol.mp. [mp=title, original title, abstract, mesh headings, heading words, keyword]
- 46 oxitropium.mp.
- 47 isoprenaline.mp.
- 48 isoetarine.mp. [mp=title, original title, abstract, mesh headings, heading words, keyword]
- 49 orciprenaline.mp.
- 50 24 or 25 or 26 or 27 or 28 or 29 or 30 or 31 or 32 or 33 or 34 or 35 or 36 or 37 or 38 or 39 or 40 or 41 or 42 or 43 or 44 or 45 or 46 or 47 or 48 or 49
- 51 23 or 50

52 7 and 14 and 51
