# Supplementary material for: Short-acting bronchodilators for the management of acute exacerbations of chronic obstructive pulmonary disease in the hospital setting: systematic review
Source: Springer Nature journal article supplement (doi:10.1186/s13643-018-0860-0), 2018-11-29
Supplement: MOESM3 [file 16304896]

# **Short acting bronchodilators for the inpatient management of COPD.**

*Study quality assessment & data extraction form*

**Reviewers Name:**

**Date of form completion:**

**RevMan Study ID**

## **References to this Trial**

Check other references identified in searches. If there are further references to this trial (i.e. multiple publications for the same study) link the papers now & list below. All references to a trial should be linked under one *Study ID* in RevMan.

| Code each paper | References                                                                                                                               |
|-----------------|------------------------------------------------------------------------------------------------------------------------------------------|
|                 | Format: [Surname] [initial], (etc). [Year of publication] [Title of paper]. [ <i>Journal title</i> ]; [volume] [(issue)]: [page numbers] |
|                 |                                                                                                                                          |

## **Methods:**

|                                                                          | Further details |
|--------------------------------------------------------------------------|-----------------|
| Country:                                                                 |                 |
| Design: (e.g., RCT)                                                      |                 |
| Objective: (Aim of the study)                                            |                 |
| Study Site: (Hospital, specialist sleep clinic, research institute etc.) |                 |
| Methods of analysis: (e.g., Logistic regression etc.)                    |                 |
| Adjustment for clustering                                                |                 |

## **Participants:**

| <i>(If multiple intervention/control arms label as 1. 2. 3. etc.)</i> | Further details      |                 |
|-----------------------------------------------------------------------|----------------------|-----------------|
|                                                                       | <u>Intervention:</u> | <u>Control:</u> |
| Eligible for study (n-value):                                         |                      |                 |
| Randomised: (n-value for each arm of study randomised)                |                      |                 |
| Completed: (participant completion n-value for each                   |                      |                 |

|                                                                  |  |  |
|------------------------------------------------------------------|--|--|
| arm of study)                                                    |  |  |
| Age: (mean value &/or range for each arm)                        |  |  |
| Gender: (for each arm)                                           |  |  |
| COPD diagnosis criteria                                          |  |  |
| Recruitment: (through what means, e.g., outpatient clinics etc.) |  |  |
| Diseases/co-morbidities included:                                |  |  |
| Reasons for Subject Exclusion:                                   |  |  |

***Interventions:***

|                                             |                 |
|---------------------------------------------|-----------------|
|                                             | Further details |
| Setting:                                    |                 |
| Duration of intervention: (weeks and hours) |                 |
| Intervention description                    |                 |
| Control description                         |                 |

***Outcomes:***

|                                  |                 |
|----------------------------------|-----------------|
|                                  | Further details |
| List the pre specified outcomes: |                 |
| Notes:                           |                 |

**Data extraction**

| <b><u>Outcomes relevant to your review</u></b>  | <b><u>Continuous=C<br/>Dichotomous=D</u></b> | <b><u>Reported in<br/>paper<br/>(YES / NO)</u></b> |
|-------------------------------------------------|----------------------------------------------|----------------------------------------------------|
| Avoidance of treatment failure i.e. avoided ICU |                                              |                                                    |
| Dyspnoea                                        |                                              |                                                    |
| Sputum purulence/production                     |                                              |                                                    |
| FEV1                                            |                                              |                                                    |
| FVC                                             |                                              |                                                    |
| Quality of Life                                 |                                              |                                                    |
| FOSQ                                            |                                              |                                                    |
| SF36                                            |                                              |                                                    |
| Nottingham health profile (part 2)              |                                              |                                                    |
| Euroqol                                         |                                              |                                                    |
| General Health Questionnaire (GHQ-28)           |                                              |                                                    |
| SAQLI                                           |                                              |                                                    |
| Other                                           |                                              |                                                    |
| Adverse Events                                  |                                              |                                                    |
| Readmission rate                                |                                              |                                                    |
| ED presentations                                |                                              |                                                    |
| Length of stay                                  |                                              |                                                    |
| Hospital admissions                             |                                              |                                                    |
|                                                 |                                              |                                                    |
|                                                 |                                              |                                                    |
|                                                 |                                              |                                                    |
|                                                 |                                              |                                                    |
|                                                 |                                              |                                                    |
|                                                 |                                              |                                                    |
|                                                 |                                              |                                                    |
|                                                 |                                              |                                                    |
|                                                 |                                              |                                                    |
|                                                 |                                              |                                                    |



### ***Risk of Bias Assessment***

| Domain                                                                                                                         | Judgement |  |
|--------------------------------------------------------------------------------------------------------------------------------|-----------|--|
| <p><b>Adequate sequence generation</b><br/>Was the allocation sequence adequately generated?</p>                               |           |  |
| <p><b>Allocation Concealment</b><br/>Was allocation adequately concealed?</p>                                                  |           |  |
| <p><b>Blinding</b><br/>Was knowledge of the allocated interventions adequately prevented during the study?</p>                 |           |  |
| <p><b>For participants</b><br/>Describe the methods used to blind participants awareness of group assignment</p>               |           |  |
| <p><b>For assessors</b><br/>Describe the methods used to blind outcome assessor(s) of group assignment for each outcome</p>    |           |  |
| <p><b>Incomplete outcome data addressed</b><br/>Were incomplete outcome data adequately addressed?</p>                         |           |  |
| <p><b>Free of selective reporting</b><br/>Are reports of the study free of suggestion of selective outcome reporting?</p>      |           |  |
| <p><b>Free of other bias</b><br/>Was the study apparently free of other problems that could put it at a high risk of bias?</p> |           |  |

| For Continuous data at day 0 |                     |           |      |    |             |      |    |                                         |
|------------------------------|---------------------|-----------|------|----|-------------|------|----|-----------------------------------------|
| Outcomes                     | Unit of measurement | 5mg group |      |    | 10 mg group |      |    | Details of outcome as described in text |
|                              |                     | n         | Mean | SD | n           | Mean | SD |                                         |
|                              |                     |           |      |    |             |      |    |                                         |
|                              |                     |           |      |    |             |      |    |                                         |
|                              |                     |           |      |    |             |      |    |                                         |
|                              |                     |           |      |    |             |      |    |                                         |
|                              |                     |           |      |    |             |      |    |                                         |
|                              |                     |           |      |    |             |      |    |                                         |
|                              |                     |           |      |    |             |      |    |                                         |
|                              |                     |           |      |    |             |      |    |                                         |
|                              |                     |           |      |    |             |      |    |                                         |
|                              |                     |           |      |    |             |      |    |                                         |
|                              |                     |           |      |    |             |      |    |                                         |
|                              |                     |           |      |    |             |      |    |                                         |
|                              |                     |           |      |    |             |      |    |                                         |

**For Continuous data at day 0**

| Outcomes | Unit of measurement | 5mg group |      |    | 10 mg group |      |    | Details of outcome as described in text |
|----------|---------------------|-----------|------|----|-------------|------|----|-----------------------------------------|
|          |                     | n         | Mean | SD | n           | Mean | SD |                                         |
|          |                     |           |      |    |             |      |    |                                         |
|          |                     |           |      |    |             |      |    |                                         |
|          |                     |           |      |    |             |      |    |                                         |
|          |                     |           |      |    |             |      |    |                                         |
|          |                     |           |      |    |             |      |    |                                         |

| For Dichotomous data |                       |                  |   |                       |                  |   |                                         |
|----------------------|-----------------------|------------------|---|-----------------------|------------------|---|-----------------------------------------|
| Outcome              | Intervention Group    |                  |   | Control Group         |                  |   | Details of outcome as described in text |
|                      | Number with event (n) | Total number (n) | % | Number with event (n) | Total number (n) | % |                                         |
|                      |                       |                  |   |                       |                  |   |                                         |
|                      |                       |                  |   |                       |                  |   |                                         |
|                      |                       |                  |   |                       |                  |   |                                         |
|                      |                       |                  |   |                       |                  |   |                                         |
|                      |                       |                  |   |                       |                  |   |                                         |
|                      |                       |                  |   |                       |                  |   |                                         |

**If more than one intervention please complete separate page for each intervention group**

**If continuous data is not presented as SD, type the format at the top of the SD column (i.e. SE, CI, p, diff)**



(Adapted from: Wynne R, Botti M & Paratz J)

| Comprehensive list of tools used to measure each of the above outcomes |              |             |           |           |
|------------------------------------------------------------------------|--------------|-------------|-----------|-----------|
| Outcome                                                                | Name of tool | Scale/range | Direction | Validated |
|                                                                        |              |             |           |           |
|                                                                        |              |             |           |           |
|                                                                        |              |             |           |           |
|                                                                        |              |             |           |           |
|                                                                        |              |             |           |           |
|                                                                        |              |             |           |           |
|                                                                        |              |             |           |           |
|                                                                        |              |             |           |           |
|                                                                        |              |             |           |           |
|                                                                        |              |             |           |           |
|                                                                        |              |             |           |           |
|                                                                        |              |             |           |           |
|                                                                        |              |             |           |           |
|                                                                        |              |             |           |           |
| <b>Other comments</b>                                                  |              |             |           |           |
|                                                                        |              |             |           |           |

(Adapted from: Wynne R, Botti M & Paratz J)

**Extra notes:**

-
